# 1 Acidophilic Micrarchaeon Seems to Maintain 2 a Slightly Alkaline Cytosolic pH

3

4 Dennis Winkler [1], Sabrina Gfrerer [1] and Johannes Gescher [1, 2, \*]

5

6 [1] Department of Applied Biology, Institute for Applied Biosciences, Karlsruhe Institute of  
7 Technology (KIT), Fritz-Haber-Weg 2, 76131 Karlsruhe, Germany;

8 [dennis.winkler@student.kit.edu](mailto:dennis.winkler@student.kit.edu); [sabrina.gfrerer@kit.edu](mailto:sabrina.gfrerer@kit.edu)

9

10 [2] Institute for Biological Interfaces, Karlsruhe Institute of Technology (KIT), Hermann-von-  
11 Helmholtz-Platz 1, 76344 Eggenstein-Leopoldshafen, Germany

12

13 [\*] Correspondence: [johannes.gescher@kit.edu](mailto:johannes.gescher@kit.edu)

14

15 **Abstract**

16 Despite several discoveries in recent years, the physiology of acidophilic Micrarchaeota  
17 remains largely enigmatic. “*Candidatus* Micrarchaeum harzensis A\_DKE”, for example, highly  
18 expresses numerous genes encoding hypothetical proteins and their function is difficult to  
19 elucidate due to a lacking genetic system. Still, not even the intracellular pH value of A\_DKE  
20 is known, and heterologous production attempts are generally missing so far. Hence, A\_DKE’s  
21 isocitrate dehydrogenase (*MhIDH*) was recombinantly produced in *Escherichia coli* and  
22 purified for bio-chemical characterisation. *MhIDH* appeared to be specific for NADP<sup>+</sup>, yet  
23 promiscuous regarding divalent cations as cofactors. Kinetic studies showed  $K_M$ -values of  
24  $53.03 \pm 5.63 \mu\text{M}$  and  $1.94 \pm 0.12 \text{ mM}$  and  $k_{cat}$ -values of  $38.48 \pm 1.62 \text{ s}^{-1}$  and  $43.99 \pm 1.46 \text{ s}^{-1}$  for DL-  
25 isocitrate and NADP<sup>+</sup>, respectively. *MhIDH*’s exceptionally low affinity for NADP<sup>+</sup>,  
26 potentially limiting its reaction rate, can be likely attributed to the presence of a proline residue  
27 in the NADP<sup>+</sup> binding-pocket, which might cause a decrease in hydrogen bonding of the  
28 cofactor and a distortion of local secondary structure. Furthermore, a pH optimum of 7.89  
29 implies, that A\_DKE applies potent mechanisms of proton homeostasis, to maintain a slightly  
30 alkaline cytosolic milieu in a highly acidic environment.

31

32 **Keywords:** Acidophiles; Archaea; Micrarchaeota; cytosolic pH; isocitrate dehydrogenase;

33

## 34 1. Introduction

35 Microorganisms can survive and thrive under extreme environmental conditions [1–3]. Bacteria  
36 and Archaea in particular are often adapted to niches of extreme temperature, pressure,  
37 radiation, salinity or pH, which allows them to populate a vast variety of habitats inaccessible  
38 to non-extremophiles [1,4]. Still, to cope with these conditions, requires a significant amount  
39 of metabolic resources, in order to adjust the intracellular reaction conditions.

40 Acidophilic Archaea, for example, are thriving in environments with pH values below pH 3  
41 [5,6], in extreme cases, optimal growth occurs close to pH 0 (i.e. *Picrophilus torridus* [7],  
42 *Ferroplasma acidiphilum* [8]). Still, these organisms are able to maintain less acidic to near  
43 neutral internal pH (pH<sub>i</sub>) values between pH 4.6 (i.e. *Picrophilus torridus*, [9]) and pH 6.5 (i.e.  
44 *Sulfolobus acidocaldarius*, [10]) by applying numerous synergistic mechanisms of proton  
45 homoeostasis [5,11,12].

46 Micrarchaeota were originally discovered in habitats with pH values between 0.5 and 4.0 [13].  
47 Common characteristics of known members of this phylum are small-sized, circular genomes  
48 and an overall limited metabolic potential [13–17]. Thus, Micrarchaeota are assumed to be  
49 dependent on a symbiotic relationship with host organisms of the order *Thermoplasmatales*  
50 [15,18,19].

51 To our best knowledge, the only acidophilic Micrarchaeon currently cultivated under laboratory  
52 conditions is “*Candidatus* Micrarchaeum harzensis A\_DKE” in co-culture with its putative host  
53 “*Ca.* Scheffleriplasma hospitalis B\_DKE” [17]. The culture was enriched from acid mine  
54 drainage biofilms originating from the abandoned pyrite mine “Drei Kronen und Ehrt” in the  
55 Harz Mountains (Germany) [18,20]. Optimal growth of the laboratory culture was achieved at  
56 pH 2 [17]. Although an extensive multi-omic-approach, comprising genomics, transcriptomics,  
57 proteomics, and metabolomics, has been conducted on A\_DKE [17,21], details of its  
58 metabolism still remain enigmatic. Approximately a third of the genes in the A\_DKE genome  
59 encode hypothetical proteins, most of which are also actively expressed, according to  
60 transcriptomic data [17]. Of note, these hypothetical protein-encoding genes comprise 35 %  
61 and 60 % of A\_DKE’s 100 and 10 highest expressed genes, respectively [unpublished data].  
62 Considering A\_DKEs reduced genome and so far largely enigmatic metabolism [17,18], these  
63 proteins of unknown function might be crucial for understanding A\_DKE’s physiology. Yet,  
64 due to low sequence conservation, *in silico* characterisation of these proteins is currently not  
65 possible and thus biochemical characterisation remains key to fully understand A\_DKE’s

66 physiology. Investigating the function of these proteins by means of heterologous expression  
67 proves to be difficult, since there is no information on the intracellular conditions in  
68 Micrarchaeota. One of the factors defining the intracellular conditions and protein stability of  
69 an organism is the  $pH_i$  value, as it affects the activity of proteins, for example in DNA  
70 transcription, protein synthesis and biocatalysis (for reviews, please check [11,22]). Thus, a  
71 suitable production platform must be chosen mimicking the intracellular conditions of A\_DKE  
72 as best as possible to facilitate proper folding of the proteins of interest.

73 The goal of this study was to gain evidence for the  $pH_i$  of A\_DKE by biochemical  
74 characterisation of an intracellular enzyme. As a target protein, its isocitrate dehydrogenase  
75 (IDH) was chosen, which is a key enzyme of the tricarboxylic acid cycle catalysing the  
76 oxidative decarboxylation of isocitrate to  $\alpha$ -ketoglutarate and  $CO_2$  [23]. This analysis revealed  
77 a slightly alkaline pH optimum indicating that A\_DKE displays a comparatively high  $pH_i$  for  
78 an acidophile.

79

## 80 2. Materials and Methods

### 81 2.1 Database Research and Bioinformatic Sequence and Structure Analyses

82 Genomic (accession number: CP060530) and transcriptomic data (accession numbers:  
83 SRX8933312-SRX8933315) of A\_DKE were accessed via the National Center for  
84 Biotechnology Information NCBI [24] (bio project number: PRJNA639692). The pH optima  
85 and kinetic parameters of homologous enzymes for comparison with experimentally identified  
86 parameters for *Mh*IDH were obtained from the BRENDA database ([25], [www.brenda-](http://www.brenda-enzymes.org)  
87 [enzymes.org](http://www.brenda-enzymes.org)).

88 The theoretical molecular weight and isoelectric point of *Mh*IDH were calculated using the  
89 CLC Main Workbench 20.0.1 (QIAGEN, Aarhus, Denmark). Conserved sequence motifs and  
90 protein domains were detected using the Pfam database ([26], [www.pfam.xfam.org](http://www.pfam.xfam.org)). *Mh*IDH  
91 homologues were identified via BLASTp [27] search of the UniprotKB/swiss-prot database  
92 [24] via NCBI. A multiple sequence alignment comparing *Mh*IDH with experimentally verified  
93 homologues from *Escherichia coli* K-12 (*Ec*IDH, NCBI: P08200.1), *Aeropyrum pernix* K1  
94 (*Ap*IDH, NCBI: GBF08417.1), *Archaeoglobus fulgidus* DSM 4304 (*Af*IDH, NCBI: O29610.1),  
95 *Haloferax volcanii* DS2 (*Hv*IDH, NCBI: D4GU92.1) and *Sulfolobus tokodaii* Strain 7 (*St*IDH,  
96 NCBI: BAB67271.1) was carried out using the Clustal Omega algorithm [28–30] as a plugin  
97 for the CLC Main Workbench 20.0.1. The alignment was visualised using the ESPript 3.0 server  
98 ([31], [www.esript.ibcp.fr](http://www.esript.ibcp.fr)).

99 Homology modelling of a putative *Mh*IDH structure was achieved via the CLC Main  
100 Workbench 20.0.1 using the crystal structure of *Ec*IDH in complex with  $\text{Ca}^{2+}$ , isocitric acid and  
101  $\text{NADP}^+$  ([32], PDB: 4AJ3, 49.5 % homology, 1.9 Å resolution) as a template. Assessment of  
102 local model quality and B-factor, as well as docking of the cofactors  $\text{Mn}^{2+}$ ,  $\text{NADP}^+$  and the  
103 substrate isocitrate to the *Mh*IDH model structure was performed using the ResQ server [33]  
104 and the COACH server [34,35] respectively. Protein ligand interactions were analysed using  
105 the PLIP server ([36], [www.plip-tool.biotech.tu-dresden.de/plip-web](http://www.plip-tool.biotech.tu-dresden.de/plip-web)). All protein structures  
106 were visualised using PyMOL 2.3.3 (Schrödinger, Ney York, USA).

107

### 108 2.2 Cloning and Recombinant Expression of *icd2*<sub>6x His</sub>

109 The *icd2* gene was PCR-amplified from genomic DNA isolated from a co-culture containing  
110 "*Ca. Micrarchaeum harzensis* A\_DKE" and "*Ca. Scheffleriplasma hospitalis* B\_DKE" [17] via

111 oligonucleotide primers 1 & 2 (see Table 1). The latter introduced a 6x His-tag encoding  
 112 sequence to the 5'-end, as well as complementary overlaps to the target vector pBAD202  
 113 (Invitrogen, Carlsbad, CA, USA). pBAD202 was linearised via inverse PCR using primers 3 &  
 114 4 (see Table 1). Both PCR products were gel-purified using the Wizard® SV Gel and PCR  
 115 Clean-Up System (Promega, Mannheim, Germany) and assembled via isothermal in vitro  
 116 ligation [37]. The resulting plasmid pBAD202\_ *icd2*<sub>6x His</sub> was transformed into *E. coli* Rosetta  
 117 pRARE (Merck, Darmstadt, Germany).

118 Table 1. Oligonucleotide primers used in this study.

| No. | Orientation | Sequence (5' → 3') <sup>1</sup>                                                                                         |
|-----|-------------|-------------------------------------------------------------------------------------------------------------------------|
| 1   | forward     | <u>GTT TAA CTT TAA GAA GGA GAT ATA CAT ACC</u> ATG <b>CAC CAT CAT CAC CAC CAT</b><br>GAA GAA CAG AAA AAA GAA TCA ATA AG |
| 2   | reverse     | <u>CCG CCA AAA CAG CCA AGC TGG AGA CCG TTT</u> TCA TGC TGA TTT TAT CGC                                                  |
| 3   | forward     | AAA CGG TCT CCA GCT TG                                                                                                  |
| 4   | reverse     | GGT ATG TAT ATC TCC TTC TTA AAG TTA AAC                                                                                 |

119 <sup>1</sup>sequence-overlaps to pBAD202 are underlined, the 6x His-tag encoded sequence is printed bold

120 In order to monitor production of *MhIDH*<sub>6x His</sub> over time, *E. coli* Rosetta pRARE  
 121 pBAD202\_ *icd2*<sub>6x His</sub> was cultivated in shaking flasks containing 50 mL Terrific Broth medium  
 122 (1.2 % (w/v) tryptone, 2.4 % (w/v) yeast extract, 0.5 % (w/v) glycerol, 17 mM KH<sub>2</sub>PO<sub>4</sub>, 72 mM  
 123 K<sub>2</sub>HPO<sub>4</sub>) supplemented with 50 µg mL<sup>-1</sup> kanamycin and 30 µg mL<sup>-1</sup> chloramphenicol at 37 °C  
 124 and 180 rpm. Upon reaching an OD<sub>600</sub> of 0.6-0.8, expression of *icd2*<sub>6x His</sub> was induced by  
 125 addition of 1 mM L-(+)-arabinose. From this point forth, the culture was incubated at 30 °C  
 126 and 180 rpm and samples (1 mL) were taken at different time points after induction (0, 1, 2, 4,  
 127 6 and 24 h), and subjected to OD<sub>600</sub>-measurement using a GENESYSTM 20 spectrophotometer  
 128 (Thermo Fisher Scientific, Schwerte, Germany) and preparation for SDS-PAGE analysis.  
 129 Samples were centrifuged for 2 min at 16 000 g and cell pellets were resuspended in 75 µL of  
 130 2x SDS loading dye (240 mM TRIS/HCl (pH 6.8), 20 % (v/v) glycerol, 2 % (w/v) SDS, 100 mM  
 131 DTT, 0.02 % (w/v) Orange G) per OD<sub>600</sub> of 0.2, boiled for 10 min at 95 °C and centrifuged  
 132 for 5 min at 16 000 g. After determination of the optimal induction time, over-expression was  
 133 carried out in a total volume of 1 L as described above. Cells were harvested for 15 min at  
 134 16 000 g and 4 °C, 4 h after induction and stored at 20 °C until used.

135

### 136 2.3 Isolation and Affinity Purification of *MhIDH*<sub>6x His</sub>

137 The cell pellet of an expression culture was resuspended in IMAC buffer (50 mM  
 138 HEPES/NaOH (pH 7.4), 500 mM NaCl) followed by the addition of a spatula tip of

139 Deoxyribonuclease I (SERVA Electrophoresis, Heidelberg, Germany). Cell extracts were  
140 prepared using mechanical disruption in an FA-078 FRENCH® Pressure Cell Press (SLM  
141 Aminco, Urbana, IL, USA) at 137.8 MPa. The raw lysate was fractioned by suc-cessive steps  
142 of centrifugation. Intact cells and cell debris were pelleted for 15 min at 6 000 g and 4 °C.  
143 Membranes were separated from the plasma fraction via ultracentrifugation for 60 min at  
144 138 000 g and 4 °C. The membrane pellet was resuspended in solubilisation buffer (20 mM  
145 HEPES/NaOH (pH 8.0), 150 mM NaCl, 2 % (v/v) Triton X-100) and the plasma fraction was  
146 passed through a 0.2 µm syringe filter (Sarstedt, Nümbrecht, Germany) to remove remaining  
147 insoluble particles. Samples of the raw lysate, as well as the membrane and plasma fraction  
148 were used for SDS-PAGE.

149 Nickel Immobilised Metal Ion Affinity chromatography (Ni<sup>2+</sup>-IMAC) for protein purification  
150 was conducted using a HisTrap® HP 5 mL column (GE Healthcare, Munich, Germany) coupled  
151 to a BioLogic DuoFlow™ Chromatography System (Bio-Rad, Munich, Germany). The column  
152 was equilibrated with IMAC buffer, prior to loading with plasma fraction. Non-specifically  
153 bound proteins were removed by washing with IMAC buffer containing 80 mM imidazole.  
154 Elution of the target protein was achieved with IMAC buffer containing 500 mM imidazole.  
155 The eluted fraction was concentrated using a 3 kDa MWCO centrifugal filter (Merck,  
156 Darmstadt, Germany). Samples of the column flow-through, wash and eluate were used for  
157 SDS-PAGE.

158 Size exclusion chromatography (SEC) of the concentrated protein solution was conducted using  
159 a HiLoad™ 26/600 Superdex™ 200 pg column (GE Healthcare, Mu-nich, Germany) coupled  
160 to the aforementioned chromatography system. The column was equilibrated and run  
161 isocratically with IDH buffer (50 mM HEPES/NaOH (pH 7.4), 150 mM NaCl, 1 mM DTT,  
162 0.5 mM MgCl<sub>2</sub>). The eluted fractions were collected, concentrated and analysed via SDS-  
163 PAGE. For long term storage at -20 °C, 50 % (v/v) glycerol was added.

164

#### 165 *2.4 Protein Quantification, SDS-PAGE & Western Blot*

166 Protein quantification of samples collected for analysis via SDS-PAGE was carried out  
167 according to [38]. Alternatively, purified protein was quantified spectrophotometrically using  
168 a NanoDrop 2000 (Thermo Fisher Scientific, Schwerte, Germany).

169 Samples containing 20 µg of total protein (5 µg in case of purified protein) were mixed with 2x  
170 SDS loading dye and separated via denaturing SDS-PAGE in hand cast 12 % TRIS/Glycine

171 gels according to [39]. As reference either BlueStar™ Prestained Protein Marker (NIPPON  
172 Genetics, Düren, Germany) or PageRuler™ Prestained Protein Ladder (Thermo Fisher  
173 Scientific, Schwerte, Germany) was used. After separation, the gels were subjected to either  
174 colloidal staining using Quick Coomassie Stain (Protein Ark, Sheffield, UK) or transfer of the  
175 separated proteins to a nitrocellulose membrane (Roth, Karlsruhe, Germany) via a semi-dry  
176 blot. The latter was carried out with a Trans-Blot® Turbo™ device (Bio-Rad, Munich,  
177 Germany) at 1.3 A for 10 min using a continuous blotting buffer system (330 mM TRIS,  
178 267 mM glycine, 15 % (v/v) ethanol, 5 % (v/v) methanol, pH 8.8).

179 Densitometric estimation of protein purity from Coomassie-stained acrylamide gels was carried  
180 out using the Image Studio Lite 5.2 software (LI-COR, Lincoln, NE, USA).

181 For immuno-staining the membrane was blocked for at least 1 h at room temperature with TBST  
182 (20 mM TRIS/HCl (pH 7.5), 500 mM NaCl, 0.05 % (v/v) Tween® 20) containing 3 % (w/v)  
183 skim milk powder. After a few brief rinses with TBST, the blot was incubated with a mouse  
184 anti-His-tag primary antibody (Sigma-Aldrich, Steinheim, Germany), diluted 1:1 000 in TBS  
185 (10 mM TRIS/HCl (pH 7.5), 150 mM NaCl) containing 3 % (w/v) BSA for 1 h, followed by  
186 washing with TBST (4x 5 min) and incubation with a goat anti-mouse alkaline phosphatase  
187 secondary antibody (Sigma-Aldrich, Steinheim, Germany) diluted 1:30 000 in TBST  
188 containing 3 % (w/v) skim milk powder for 45 min. After washing with TBST (4x 5 min) and  
189 several brief rinses with dH<sub>2</sub>O, protein bands were visualised colorimetrically using the AP  
190 conjugate substrate kit (Bio-Rad, Munich, Germany) according to manufacturer's instructions.

191

## 192 *2.5 Spectrophotometric IDH-Activity Assays and Determination of Kinetic Properties*

193 *Mh*IDH<sub>6x His</sub> activity and kinetic properties were determined at least in triplicates at 28 °C by  
194 monitoring the formation of NADH or NADPH spectrophotometrically at 340 nm using an  
195 NADH or NADPH standard curve for quantification. The standard reaction mixture contained  
196 100 mM TRIS/HCl (pH 8.0), 1 mM DL-Na<sub>3</sub>-isocitrate, 5 mM MgCl<sub>2</sub>, 2 mM Na<sub>2</sub>NADP and  
197 0.6-2.5 µg enzyme in a total volume of 200 µL. Each reaction was started individually by  
198 addition of either NADP<sup>+</sup> or enzyme using a TeInject™ Dispenser (Tecan, Männedorf, Swiss)  
199 followed by measurement of A<sub>340</sub> each 200 ms for 15-30 s using an Infinite® M 200 PRO plate  
200 reader (Tecan, Männedorf, Swiss). Investigation of cofactor-specificity was conducted by  
201 measuring specific activity with 20 mM NADP<sup>+</sup> or NAD<sup>+</sup> in presence of Mg<sup>2+</sup> and cation-  
202 dependency was determined by measuring specific activity in presence of 5 mM MgCl<sub>2</sub>, MnCl<sub>2</sub>,



203 CaCl<sub>2</sub>, ZnCl<sub>2</sub>, NiCl<sub>2</sub>, CuCl<sub>2</sub>, CoCl<sub>2</sub> and Na<sub>2</sub>EDTA, respectively, with 2 mM NADP<sup>+</sup>. The pH  
204 optimum was determined by measuring specific activity in buffers with varying pH values. A  
205 corresponding polynomial fitting curve of 5th order was calculated using Origin Pro 2020. In  
206 order to span a range from pH 5 to 9.5, three different buffer systems were applied as described  
207 in [40]: 0.1 M CH<sub>3</sub>CO<sub>2</sub>Na/CH<sub>3</sub>CO<sub>2</sub>H (pH 5.0-6.0), 0.1 M Na<sub>2</sub>HPO<sub>4</sub>/NaH<sub>2</sub>PO<sub>4</sub> (pH 5.5-7.5), and  
208 0.1 M TRIS/HCl (pH 7.0-9.5). Enzyme kinetics were determined by measuring the initial  
209 reaction rate at increasing concentrations of NADP<sup>+</sup> (0-10 mM) and DL-isocitrate (0-500 μM),  
210 respectively.  $K_M$  and  $V_{max}$  were calculated from a non-linear fit based on the Michaelis-Menten  
211 model [41,42] using Origin Pro 2020.

212

## 213 3. Results and Discussion

### 214 3.1 *MhIDH Shows Conserved Characteristics of Prokaryotic, NADP-Dependent IDHs*

215  $pH_i$  values can be estimated from the pH optima of cytosolic enzymes [43]. The enzyme of  
216 choice should be monomeric or homo-oligomeric and preferably allow cost-effective and direct  
217 activity measurement. The isocitrate dehydrogenase (IDH) of A\_DKE fulfils these  
218 requirements.

219 A\_DKE possesses only one gene (*icd2*, Micr\_00902) annotated to be encoding a putative  
220 NADP-dependent IDH, which is actively expressed, according to available transcriptomic data  
221 [17]. *In silico* analyses of its amino acid sequence allowed the calculation of a theoretical  
222 molecular weight and isoelectric point (pI) of 45.05 kDa and 5.82, respectively, as well as the  
223 discovery of a highly conserved isocitrate/isopropylmalate dehydrogenase domain (Pfam:  
224 PF00180.20), almost spanning the entire length of the sequence (Thr23-Leu402). Furthermore,  
225 a BLASTp search of the UniprotKB/swiss-prot database revealed high sequence homology to  
226 several experimentally proven homo-dimeric, NADP-dependent IDHs with nearly all amino  
227 acids reported to be involved in substrate and cofactor binding being conserved (see Figure A1  
228 and Table A1). Hence, this bioinformatic data strongly suggests that this protein is indeed an  
229 IDH and thus can be used for biochemical characterisation.

230

### 231 3.2. *MhIDH<sub>6x His</sub> Can be Produced in E. coli.*

232 Since direct purification of native *MhIDH* from “*Ca. Micrarchaeum harzensis* A\_DKE” is not  
233 feasible due to only low cell density cultures, the corresponding gene was cloned and over-  
234 expressed in *E. coli*. Test-expression over time showed high ex-pression levels with a maximum  
235 at 4 h after induction and no significant degradation of the product, even 24 h after induction  
236 (see Figure 1a). The protein has an apparent molecular weight of roughly 50 kDa, matching the  
237 theoretical molecular weight. It was found to be located in the cytoplasmic fraction and could  
238 not be detected in the membrane fraction (see Figure 1b). Affinity purification of *MhIDH<sub>6x His</sub>*  
239 from the plasma fraction was successful in a single step, providing roughly 90 % of  
240 electrophoretic homogeneity (see Figure 1c). SEC was used for further purification.

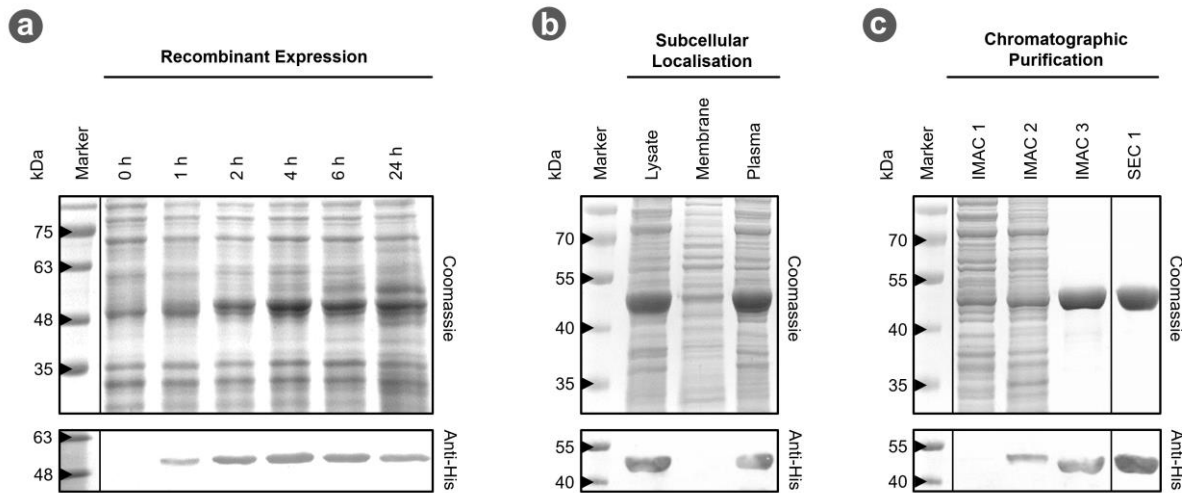

241

242 **Figure 1. Recombinant production and purification of *MhIDH*<sub>6x His</sub>.** (a) 12 % SDS-PAGE of samples from test-expression  
243 of *icd2*<sub>6x His</sub>. Cell samples were taken 0, 1, 2, 4, 6 and 24 h after induction of gene expression, normalised to identical cell  
244 densities and disrupted by thermal and chemical lysis, prior to loading on the gel. Identical gels were prepared for colloidal  
245 Coomassie- (top) and colorimetric immuno-staining using an anti His-tag primary antibody (bottom). (b & c) 12 % SDS-PAGE  
246 of samples from isolation and chromatographic purification of *MhIDH*<sub>6x His</sub>. Gels were Coomassie- and immuno-stained as  
247 described above. IMAC 1, 2, and 3 refer to the flow through during loading of the Ni<sup>2+</sup>-IMAC column, and the fractions which  
248 eluted with 80 mM and 500 mM imidazole, respectively. SEC 1 refers to the first fractions eluted during size exclusion chroma-  
249 tography.

250

### 251 3.3 Biochemical Properties of *MhIDH*<sub>6x His</sub>

#### 252 3.3.1 *MhIDH*<sub>6x His</sub> Activity is Dependent on NADP<sup>+</sup> and Divalent Cations

253 IDHs catalyse the oxidative decarboxylation of isocitrate to  $\alpha$ -ketoglutarate and CO<sub>2</sub>. The  
254 electrons released in this process are transferred to either NAD<sup>+</sup> (EC 1.1.1.41) or NADP<sup>+</sup>  
255 (EC1.1.1.42) [23,44]. Type I IDHs found in Bacteria and Archaea predominantly use NADP<sup>+</sup>  
256 [44,45]. Still, promiscuous forms accepting both cofactors have been reported as well [46–48].  
257 Furthermore, IDHs are known to be dependent on divalent metal cations, such as Mg<sup>2+</sup> and  
258 Mn<sup>2+</sup> [49]. In order to characterise enzyme activity of recombinant *MhIDH*, its dependency on  
259 different cofactors was tested.

260 With  $41.09 \pm 1.02 \mu\text{mol min}^{-1} \text{mg}^{-1}$  *MhIDH*<sub>6x His</sub> activity is about 55-fold higher using NADP<sup>+</sup>  
261 as cofactor relative to NAD<sup>+</sup> with only  $0.74 \pm 0.09 \mu\text{mol min}^{-1} \text{mg}^{-1}$  (see Figure 2a). The apparent  
262 NADP<sup>+</sup> specificity of the enzyme is also supported by structural data. The primary structure of  
263 *MhIDH* contains conserved amino acid residues (Lys335, Tyr336 and Arg386) in the active site  
264 (see Figure A1), which have been shown in *EcIDH* [50,51], *StIDH* [52] and *ApIDH* [53] to

265 specifically stabilise the 2'-phosphate moiety of NADP<sup>+</sup> ensuring that NADP<sup>+</sup> is bound  
266 preferably.

267 As expected, divalent cations appear to be vital for *MhIDH*<sub>6x His</sub> function, as the enzyme does  
268 not show any activity in presence of EDTA (see Figure 2b). Still, with several different metal  
269 ions having an activating effect, *MhIDH* is rather promiscuous in this regard. While Mn<sup>2+</sup> and  
270 Mg<sup>2+</sup> induced maximal activity increases, only 44.2±4.01 %, 43.2±1.99 % and 6.6±0.60 % of  
271 relative maximal activity can be achieved with Cu<sup>2+</sup>, Co<sup>2+</sup>, and Ni<sup>2+</sup>, respectively. Zn<sup>2+</sup> and  
272 Ca<sup>2+</sup>, on the other hand, do not seem to enhance enzyme activity, as in presence of these ions  
273 *MhIDH*<sub>6x His</sub> is only marginally more active than in presence of EDTA. The variance in  
274 activation levels in presence of different cations is seemingly independent of ionic radii and is  
275 hypothesised to be due to individual modes of binding in the active site of the enzyme [54].  
276 Moreover, Zn<sup>2+</sup> [55] and Ca<sup>2+</sup> [54,56] have been reported to inhibit IDH activity. In case of  
277 Ca<sup>2+</sup>, this is most likely due to a spatial shift of ligands bound in the active site in order to  
278 accommodate the large ionic radius of the cation [56].

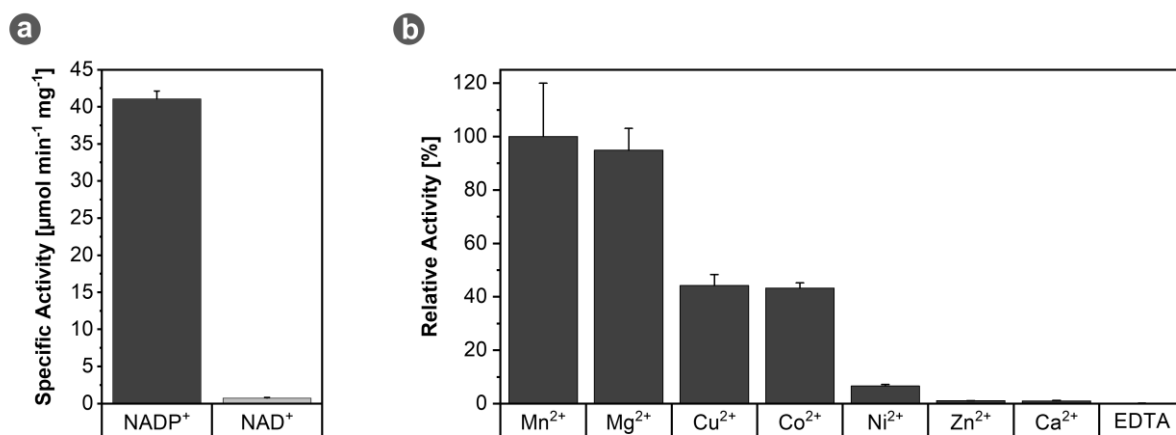

279  
280 **Figure 2. Cofactor-specificity of *MhIDH*<sub>6x His</sub>.** (a) Specific IDH activity in presence of 20 mM NADP<sup>+</sup> (dark grey) or 20 mM  
281 NAD<sup>+</sup> (light grey). Assays were performed at pH 8 and 28 °C in presence of Mg<sup>2+</sup>. (b) Relative *MhIDH*<sub>6x His</sub> activity in presence  
282 of different divalent cations and EDTA. Assays were performed at pH 8 and 28 °C in presence of NADP<sup>+</sup>.

283

### 284 3.3.2 *MhIDH*<sub>6x His</sub> Shows Highest Activity at Slightly Alkaline pH

285 With the optimal cofactor combination known, specific activity was measured at different pH  
286 values in increments of 0.5. From this data a non-linear fitting curve was calculated with the  
287 global maximum of the curve indicating the pH optimum of the enzyme, which was identified  
288 to be pH 7.89. At least 90 % of the maximum specific activity could be retained in a range from  
289 pH 7.39 to 8.35 (see Figure 3a). A comparison to other IDHs, listed in the BRENDA database

290 reveals this feature to be quite common, as it is close to the median value of pH 8 (see Figure  
291 3b).

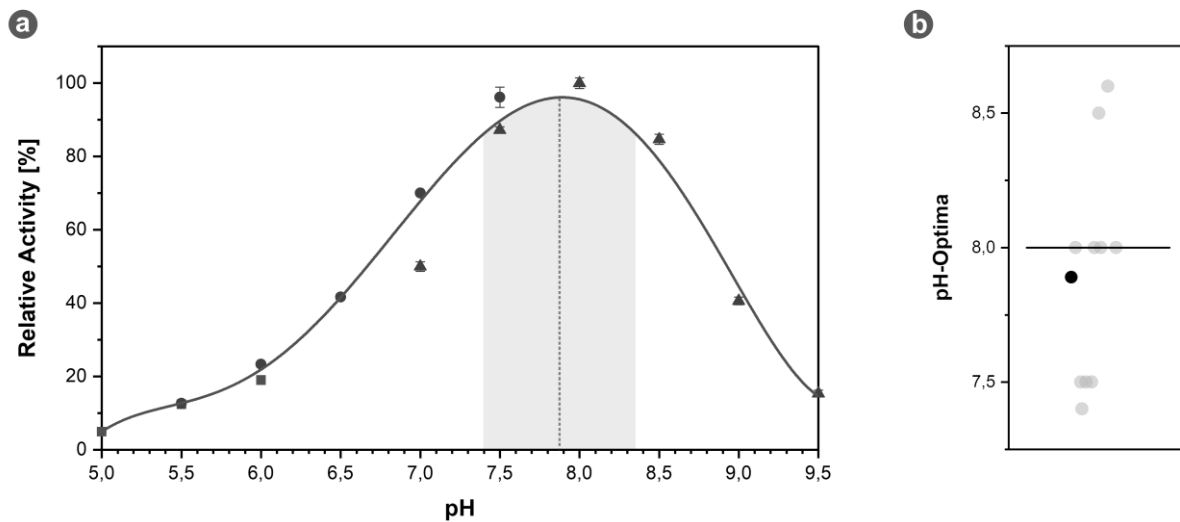

292  
293 **Figure 3. Optimal pH of *MhIDH*<sub>6x His</sub>.** (a) Specific IDH activity as a function of the pH value with a polynomial fitting curve  
294 of 5th order ( $R^2 > 0.99$ ). The global maximum of the curve corresponding to the pH optimum of 7.89 is indicated by a dashed  
295 line, the range of specific activity higher than 90 % of the maximal activity is highlighted in grey. pH ranges with sodium  
296 acetate (■), sodium phosphate (●) and TRIS/HCl (▲) buffers are indicated by the respective symbols. Assays were conducted  
297 at 28 °C in presence of NADP<sup>+</sup> and Mg<sup>2+</sup>. (b) Distribution of pH optima of homologous IDHs listed in the BRENDA database  
298 (see Table A2). The pH optimum of *MhIDH*<sub>6x His</sub> is highlighted in black. The median is indicated by a black bar.

299 Note however, that IDHs in this comparison exclusively originate from neutralophilic  
300 organisms, since to our knowledge data on pH optima of IDHs from acidophilic organisms is  
301 scarce. One of these few cases being *Thermoplasma acidophilum* IDH (*TaIDH*). Growing  
302 optimally in environments with pH values of 1-2, *T. acidophilum* has a pH<sub>i</sub> value of 5.8 [57].  
303 Contrary to that, *TaIDH* displays optimal activity at pH 7.5 [58]. Still, *TaIDH* is reported to  
304 retain a third of its maximal specific activity at pH 5.8 [58], which is not the case for  
305 *MhIDH*<sub>6x His</sub>. Moreover, other enzymes of acidophiles are reported to display highest activity at  
306 slightly acidic pH values [6,59,60]. This finding implies a higher intracellular pH of A\_DKE  
307 compared to other acidophiles.

308

### 309 3.3.3 *MhIDH*<sub>6x His</sub> is Characterised by Low NADP<sup>+</sup> Affinity

310 Kinetic data of *MhIDH*<sub>6x His</sub> was obtained for the substrate DL-isocitrate and the cofactor  
311 NADP<sup>+</sup> (see Figure 4a & b). Overall, kinetic properties of *MhIDH*<sub>6x His</sub> regarding DL-isocitrate  
312 appear to be quite average compared to other IDHs (see Figure 4c and Table A2), as with  $K_M =$   
313  $53.03 \pm 5.63 \mu\text{M}$ ,  $k_{cat} = 38.48 \pm 1.62 \text{ s}^{-1}$  and  $k_{cat}/K_M = 725 \pm 107.62 \text{ mM}^{-1} \text{ s}^{-1}$  all parameters lie close

314 to the respective median value. Regarding NADP<sup>+</sup>, on the other hand, *MhIDH*<sub>6x His</sub> performs  
 315 significantly worse in comparison to other IDHs (see Figure 4d and Table A2). A  $K_M$  of  
 316  $1.94 \pm 0.12$  mM is exceptionally high compared to other IDHs being the least specific enzyme  
 317 in the comparison. Despite a decent turnover rate close to the median value ( $k_{cat} =$   
 318  $43.99 \pm 1.46$  s<sup>-1</sup>), *MhIDH*<sub>6x His</sub> ranks among the three IDHs with the lowest catalytic efficiency  
 319 ( $k_{cat}/K_M = 22.69 \pm 2.15$  mM<sup>-1</sup> s<sup>-1</sup>). All in all, low affinity to NADP<sup>+</sup> seems to be the bottleneck  
 320 limiting the overall reaction rate of *MhIDH*<sub>6x His</sub> and possibly the metabolic rate of the whole  
 321 organism, given that IDH is a key enzyme of the tricarboxylic acid cycle, which is the central  
 322 metabolic pathway in A\_DKE [18].

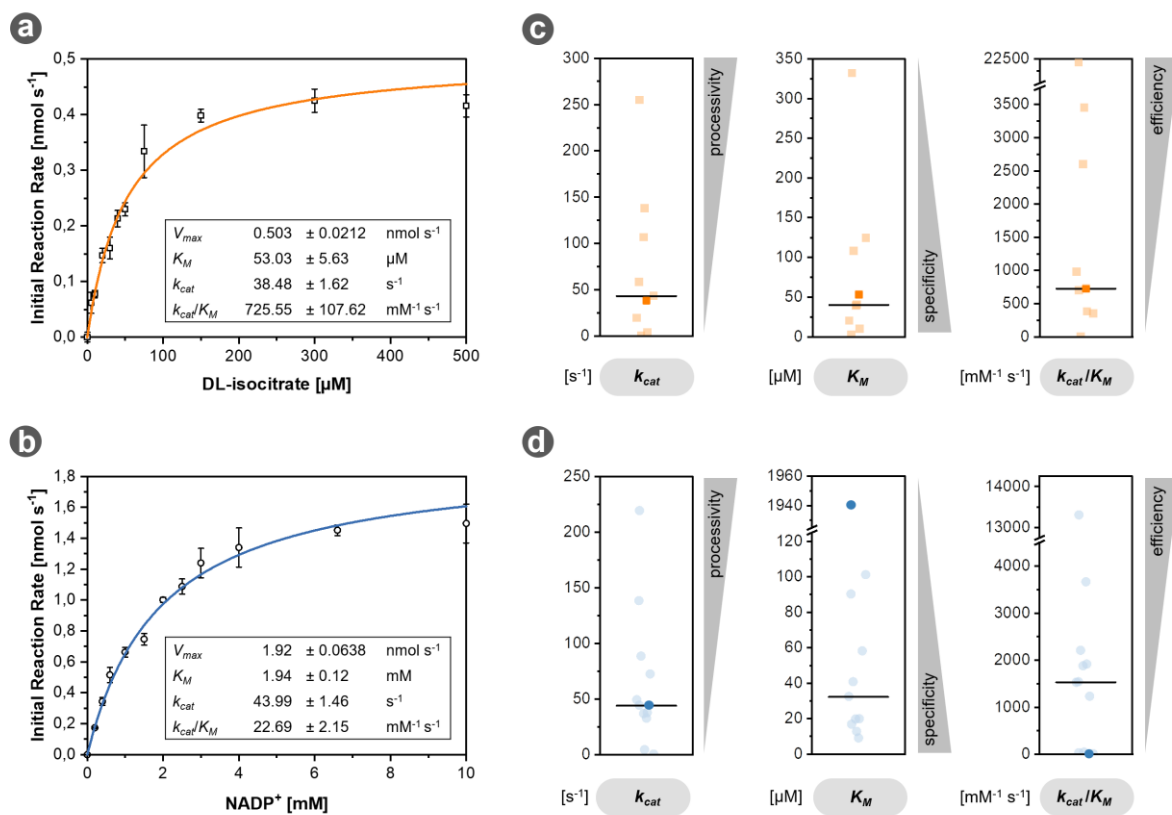

323  
 324 **Figure 4. Enzyme kinetics of *MhIDH*<sub>6x His</sub>.** (a & b) The initial reaction rate of the enzyme for DL-isocitrate (□, orange) and  
 325 NADP<sup>+</sup> (○, blue) was measured at the indicated substrate concentrations and fit according to the Michaelis-Menten model  
 326 ( $R^2$  (DL-isocitrate) > 0.98,  $R^2$  (NADP<sup>+</sup>) > 0.99). The corresponding kinetic parameters derived from the fits are given in the  
 327 respective inset tables. All assays were conducted at 28 °C in presence of Mg<sup>2+</sup>, as well as 1 mM of DL-isocitrate and 20 mM  
 328 of NADP<sup>+</sup>, respectively. Reaction mixtures contained 2 and 0.6 μg enzyme per reaction for NADP<sup>+</sup> and DL-isocitrate kinetics,  
 329 respectively. (c & d) Comparison of kinetic parameters of *MhIDH*<sub>6x His</sub> for DL-isocitrate (□, orange) and NADP<sup>+</sup> (○, blue)  
 330 with those of other IDHs listed in the BRENDA database (transparent, see Table A2). The parameters of *MhIDH*<sub>6x His</sub> are  
 331 highlighted in opaque orange and blue, respectively. The corresponding median values are indicated by a black bar.

332 To investigate potential ligand binding mechanisms in *MhIDH*, we conducted a multiple  
 333 sequence alignment with other experimentally verified IDHs and modelled a putative structure

334 (see Figure 5) using a crystal structure of *Ec*IDH as a template. The model features high  
335 estimated local model quality and shows the characteristic fold of prokaryotic NADP-  
336 dependent IDHs, comprising a large and a small domain responsible for cofactor and substrate  
337 binding, respectively, as well as a clasp domain allow-ing homo-dimerisation ([52,53], see  
338 Figure 5b). The estimated local B-factor of the model indicates a rigid core, as well as flexible  
339 loops surrounding the active site in between the small and large domain (see Figure 5b), which  
340 allow conformational change necessary for catalytic activity in *Ec*IDH [32]. Ligands isocitrate,  
341 NADP<sup>+</sup> and Mn<sup>2+</sup> could be docked in the active sites of the homo-dimeric model, with their  
342 relative positions closely resembling those in *Ec*IDH (see Figure 5c).

343 A comparably average  $K_M$  value for isocitrate is not surprising, considering that without  
344 exception all amino acids known to be involved in isocitrate binding in other IDHs  
345 [32,52,53,56] are conserved in the isocitrate binding pocket of *Mh*IDH (see Figure 5a).

346 Furthermore, low affinity of *Mh*IDH for NADP<sup>+</sup> can be explained by structural analysis, as  
347 well. The NADP<sup>+</sup> binding pocket in *Ec*IDH is formed by the  $3_{10}$ -helix  $\eta_4$  (residues 318-324),  
348 the NADP<sup>+</sup> binding loop (residues 336-352), as well as helix  $\alpha_{12}$  (residues 390-397) [32]. In  
349 particular, amino acids Lys100, Leu103, Thr105, Asn232\*, amino acids 258\*-261\*, Trp263\*,  
350 Gln287\*, Gln288\*, Arg292\*, Glu336, His339, Gly340, Ala342, Lys344, Tyr345, Asn352,  
351 Tyr391 und Arg395 (\* marks amino acids from the second subunit of the homo-dimer) are  
352 involved in binding NADP<sup>+</sup> via hydrogen bonds or salt bridges ([32], see Figure 5a).  
353 Corresponding residues in *St*IDH [52] and *Ap*IDH [53] have been described to facilitate NADP<sup>+</sup>  
354 binding, as well (see Figure 5a). Almost all of the corresponding amino acids in *Mh*IDH are  
355 conserved or at least display similar physicochemical properties (Tyr254\* instead of Trp263\*  
356 and Lys282\* instead of Arg292\*), the only exception being Tyr391 (see Figure 5a & d), which  
357 is substituted for a proline in *Mh*IDH (Pro382). While this appears to be a common feature  
358 among isopropylmalate dehydrogenases rather than IDHs (i.e. in *Thermus thermophilus* [61]),  
359 *Mh*IDH showed significantly higher sequence homology to the latter (see Table A1). Since  
360 Tyr391 forms hydrogen bonds stabilising the 2'-phosphate of NADP<sup>+</sup> (see Figure 5a & d) this  
361 amino acid plays a critical role in cofactor stabilisation and selectivity in *Ec*IDH [50,51,61].  
362 Moreover, it has been reported that a proline at this position disrupts the local  $\alpha$ -helix in favour  
363 of a  $\beta$ -turn [61,62], which could distance Lys386, another crucial residue ensuring NADP<sup>+</sup>  
364 specificity, from the 2'-phosphate of NADP<sup>+</sup> and thereby decrease cofactor stabilisation even  
365 more.

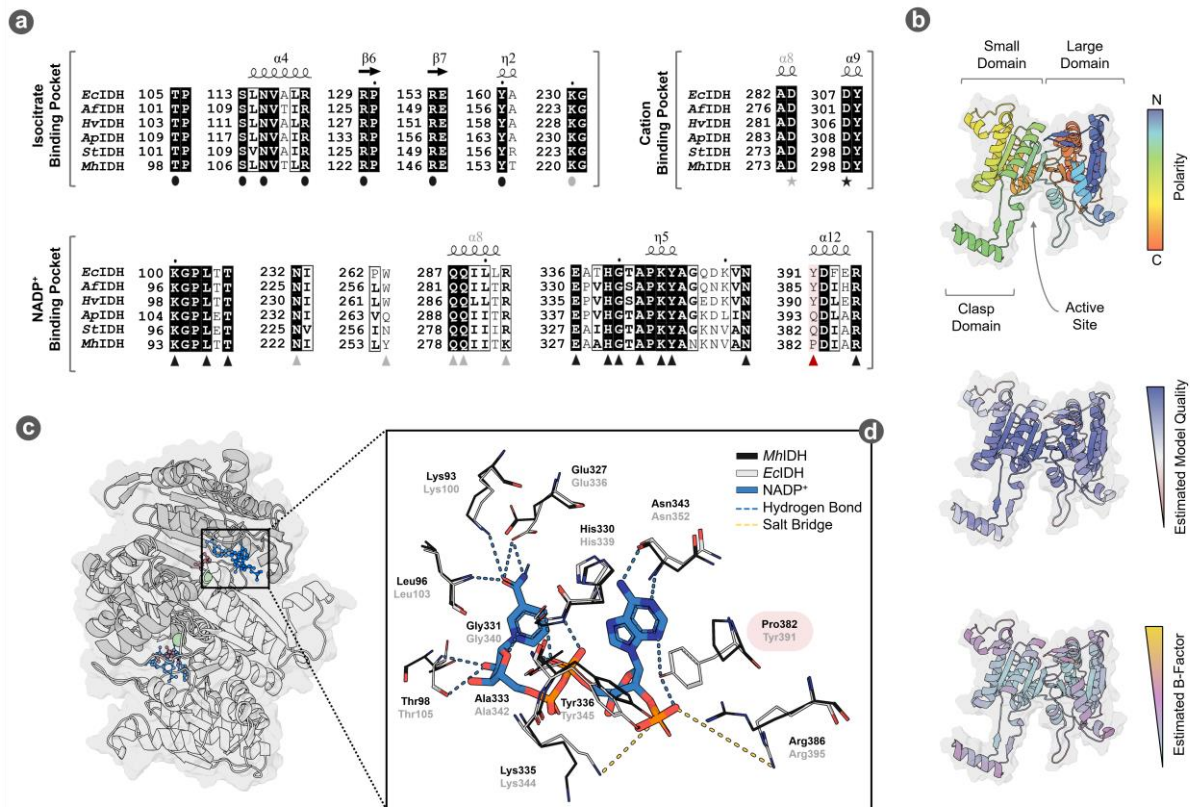

366

367 **Figure 5. Putative structure and ligand binding in *MhIDH*.** (a) Partial multiple sequence alignment of the substrate and  
368 cofactor binding pockets of *MhIDH* with IDH sequences from *E. coli* K-12 (*EcIDH*, NCBI: P08200. 1), *Archaeoglobus fulgidus*  
369 DSM 4304 (*AfIDH*, NCBI: O29610.1), *Haloferax volcanii* DS2 (*HvIDH*, NCBI: D4GU92.1), *Aeropyrum pernix* K1 (*ApIDH*,  
370 NCBI: GBF08417.1) and *Sulfolobus tokodaii* strain 7 (*StIDH*, NCBI: BAB67271.1). Identical amino acids are highlighted in  
371 black, homologous amino acids are boxed. Residues involved in isocitrate (●) cation (★) and NADP<sup>+</sup> (▲) binding in *EcIDH*  
372 according to [32] are highlighted by the corresponding symbols. The position of Pro382 in *MhIDH* is highlighted in red.  
373 Residues of the second homo-dimer subunit involved in ligand binding are highlighted in grey symbols. Full alignment see  
374 Figure A1. (b) Putative structure of monomeric *MhIDH* homology-modelled after the crystal structure of *EcIDH* ([32], PDB:  
375 4AJ3, 49.5 % sequence homology, 1.9 Å resolution) in ribbon representation and coloured according to orientation of the  
376 backbone, as well as estimated local model quality and B-factor as determined by the ResQ server. The surface representation  
377 of the protein is indicated in the background. (c) Ribbon representation of a putative quaternary structure of *MhIDH* in top  
378 view, forming a homo-dimer with an active site located between the large and small domain of each subunit. Docked ligands  
379 isocitrate (red), NADP<sup>+</sup> (blue) and Mn<sup>2+</sup> (green) are shown in ball-and-stick representation. (d) Detail-view of a structural  
380 alignment of the NADP binding pockets in the *MhIDH* model (black) and the *EcIDH* crystal structure (grey). Side chains of  
381 amino acids presumably involved in cofactor binding, as well as NADP<sup>+</sup> are displayed as stick-models and are highlighted  
382 according to their atomic composition: O – red; N – blue, P – orange; C – grey (*EcIDH*), black (*MhIDH*) or blue (NADP<sup>+</sup>).  
383 Interactions between *EcIDH* residues and NADP<sup>+</sup> are indicated by dashed lines (salt bridges – yellow; hydrogen bonds – light  
384 blue).

385



## 386 4. Conclusion

387 Although several approaches lead to new findings about Micrarchaeota in the last decade, the  
388 survival strategies of these ultra-small, acidophilic organisms are still not fully understood. In  
389 this study, we gained evidence for the internal pH of “Ca. Micrarchaeum harzensis A\_DKE”,  
390 by characterisation of its IDH. The enzyme was successfully produced in *E. coli* and  
391 biochemically characterised. Compared to other known IDHs, the NADP<sup>+</sup> and divalent cation-  
392 dependent protein from A\_DKE seems to be highly inefficient because of the amino acid  
393 composition of its NADP<sup>+</sup> binding-pocket. Since *Mh*IDH plays a role in A\_DKE’s main  
394 pathway for generation of reducing equivalents, its inefficiency is in line with the slow growth  
395 rates of the Micrarchaeon.

396 Over the years, a vast arsenal of methods, suitable for the determination of pH<sub>i</sub> values has been  
397 developed, including cell homogenate measurement, pH-sensitive fluorescent proteins and  
398 fluorescent probes, injection of microelectrodes and <sup>31</sup>P-NMR spectroscopy. All these methods  
399 come with individual strengths and weaknesses, discussed elsewhere [11,63]. In our specific  
400 case, however, experimental determination of the pH optimum of an intracellular enzyme as  
401 described in [6,43] remained the only viable option.

402 The presented data suggests that A\_DKE maintains a slightly alkaline cytosolic milieu close to  
403 pH 8, while thriving in acidic environments of pH 2, resulting in a steep pH gradient of several  
404 orders of magnitude. Should this assumption be correct, A\_DKE would have the highest pH<sub>i</sub>  
405 among all acidophiles described so far, which raises the question how the Micrarchaeon is able  
406 to maintain this pH gradient. In literature there are several synergistic strategies of proton  
407 homeostasis described for acidophiles [5,11], many of which might apply to A\_DKE as well:

408 Membranes consisting of archaeal tetraetherlipids have been reported to be highly impermeable  
409 for protons [5,64–67]. With a caldarchaeol content of 97 % the cell membrane of A\_DKE is  
410 predominantly composed of such lipids [17]. Furthermore, in *T. acidophilum* HO-62 a  
411 correlation between acid tolerance and elevated levels of surface glycosylation has been found  
412 [68]. The cell surface of A\_DKE is mostly covered by a proteinaceous, heavily glycosylated S-  
413 layer [21]. Since, biomimetic experiments strongly suggest, that polysaccharide chains attached  
414 to the cell surface might effectively create a proton shelter [69], the glycans linked to A\_DKE’s  
415 S-layer, could allow further shielding from protons. Another mechanism of acidophiles to repel  
416 invading protons is the formation of a positive potential at the inside of the cell membrane via  
417 cation transporters [5,11,12,67]. Also, acidophiles are known to express a variety of primary

418 proton transporters in order to counteract cellular protonation caused by ATP synthase activity  
419 [5,11,12]. According to transcriptomic data, A\_DKE seems to express several genes encoding  
420 (putative) proton pumps and cation transporters (see Table A3), which would allow export of  
421 protons to the extracellular space, as well as antiport exchanging protons for cations.

422 Lastly, this study proves the viability of recombinant production of functional A\_DKE proteins  
423 in *E. coli*, which opens numerous possibilities for the biochemical characterisation of proteins  
424 of unknown function in A\_DKE.

425

426 **Author Contributions:** Conceptualisation, J.G.; methodology, D.W.; validation, D.W. and  
427 J.G.; formal analysis, D.W.; investigation, D.W.; resources, J.G.; data curation, D.W. and S.G.;  
428 writing—original draft preparation, D.W., S.G. and J.G.; writing—review and editing, D.W.,  
429 S.G. and J.G.; visualisation, D.W.; supervision, J.G.; project administration, J.G.; funding  
430 acquisition, J.G. All authors have read and agreed to the published version of the manuscript.

431 **Funding:** This research received no external funding.

432 **Data Availability Statement:** All data shown is contained within the article.

433 **Conflicts of Interest:** The authors declare no conflict of interest.

434

## 435 Appendix A

436

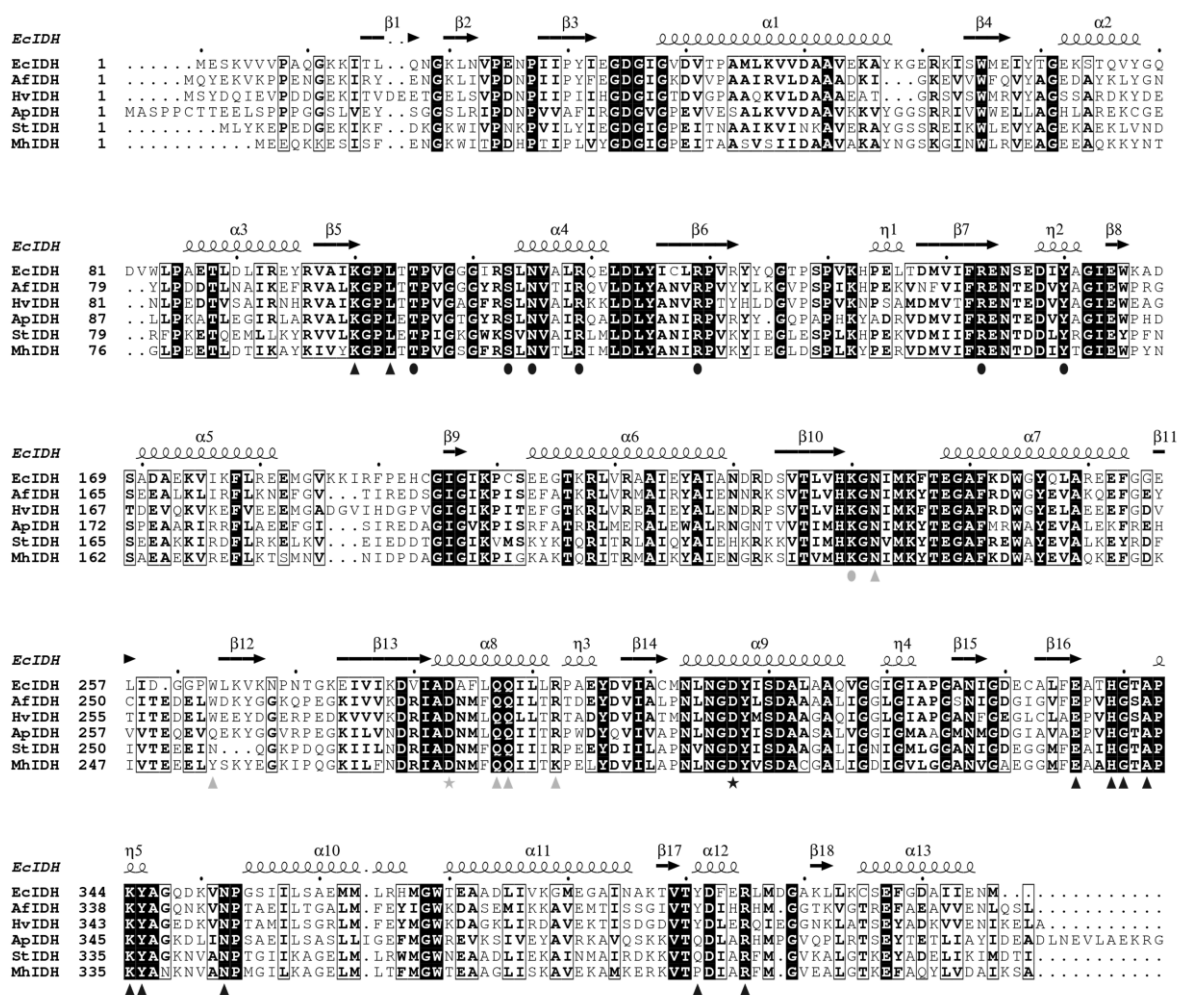

437

438 **Figure A1. Multiple Sequence Alignment of *MhIDH* with homologous NADP-specific IDHs.** *MhIDH*-homologues from  
 439 *E. coli* K-12 (*EcIDH*, NCBI: P08200.1), *Archaeoglobus fulgidus* DSM 4304 (*AfIDH*, NCBI: O29610.1), *Haloferax volcanii*  
 440 DS2 (*HvIDH*, NCBI: D4GU92.1), *Aeropyrum pernix* K1 (*ApIDH*, NCBI: GBF08417.1) and *Sulfolobus tokodaii* Strain 7  
 441 (*StIDH*, NCBI: BAB67271.1) were identified via BLASTp-search and aligned using Clustal Omega. Identical amino acids are  
 442 highlighted in black, similar amino acids are boxed. Secondary structure elements of *EcIDH* (above) named according to their  
 443 type and number of appearance are indicated by arrows ( $\beta$ -strands), as well as large and small squiggles ( $\alpha$ - and  $\eta$ )-helices,  
 444 respectively. Amino acids involved in isocitrate- (●), NADP<sup>+</sup>- (▲) and cation-binding (★) in *EcIDH* are highlighted below  
 445 by the indicated symbols. The symbols in grey represent amino acids which interact with the ligands in the active site of the  
 446 other homo-dimer subunit.

447

448 **Table A1.** Selected results of a BLASTp-search for homologues of *Mh*IDH using the UniprotKB/swiss-prot database as a  
449 reference.

| NCBI accession | Description                                                                                    | e-value     | Identity [%] |
|----------------|------------------------------------------------------------------------------------------------|-------------|--------------|
| O29610.1       | Isocitrate dehydrogenase [NADP]; [ <i>Archaeoglobus fulgidus</i> DSM 4304]                     | 3.54E-150   | 55.47        |
| P96318.2       | Isocitrate dehydrogenase [NADP]; [ <i>Caldococcus noboribetus</i> ]                            | 9.487E-147  | 54.61        |
| D4GU92.1       | Isocitrate dehydrogenase [NADP]; [ <i>Haloferax volcanii</i> DS2]                              | 1.2741E-134 | 48.05        |
| P08200.1       | Isocitrate dehydrogenase [NADP]; [ <i>Escherichia coli</i> K-12]                               | 9.9176E-128 | 49.75        |
| P39126.1       | Isocitrate dehydrogenase [NADP]; [ <i>Bacillus subtilis</i> subsp. <i>subtilis</i> str. 168]   | 5.42E-127   | 49.40        |
| Q9ZH99.1       | Isocitrate dehydrogenase [NADP]; [ <i>Coxiella burnetii</i> RSA 493]                           | 2.2534E-126 | 49.26        |
| P65099.1       | Isocitrate dehydrogenase [NADP]; [ <i>Staphylococcus aureus</i> subsp. <i>aureus</i> Mu50]     | 5.4508E-125 | 49.14        |
| Q6G8N2.1       | Isocitrate dehydrogenase [NADP]; [ <i>Staphylococcus aureus</i> subsp. <i>aureus</i> MSSA476]  | 6.9239E-125 | 49.14        |
| Q5HNL1.1       | Isocitrate dehydrogenase [NADP]; [ <i>Staphylococcus epidermidis</i> RP62A]                    | 9.4905E-125 | 49.14        |
| Q6GG12.1       | Isocitrate dehydrogenase [NADP]; [ <i>Staphylococcus aureus</i> subsp. <i>aureus</i> MRSA252]  | 1.2055E-124 | 49.63        |
| P56063.1       | Isocitrate dehydrogenase [NADP]; [ <i>Helicobacter pylori</i> 26695]                           | 2.7939E-122 | 49.27        |
| Q9ZN36.1       | Isocitrate dehydrogenase [NADP]; [ <i>Helicobacter pylori</i> J99]                             | 6.5213E-122 | 48.66        |
| Q02NB5.1       | Isocitrate dehydrogenase [NADP]; [ <i>Pseudomonas aeruginosa</i> UCBPP-PA14]                   | 7.6852E-122 | 49.23        |
| Q59940.2       | Isocitrate dehydrogenase [NADP]; [ <i>Streptococcus mutans</i> UA159]                          | 3.6802E-120 | 46.02        |
| P41560.2       | Isocitrate dehydrogenase [NADP] 1; [ <i>Colwellia maris</i> ]                                  | 1.0682E-119 | 48.65        |
| Q59985.1       | Isocitrate dehydrogenase [NADP]; [ <i>Streptococcus salivarius</i> ]                           | 9.7535E-116 | 46.27        |
| P50214.1       | Isocitrate dehydrogenase [NADP]; [ <i>Nostoc</i> sp. PCC 7120 = FACHB-418]                     | 1.995E-113  | 42.58        |
| P80046.2       | Isocitrate dehydrogenase [NADP]; [ <i>Synechocystis</i> sp. PCC 6803 substr. <i>Kazusa</i> ]   | 3.0758E-109 | 42.45        |
| O67480.1       | Isocitrate dehydrogenase [NADP]; [ <i>Aquifex aeolicus</i> VF5]                                | 4.518E-109  | 46.62        |
| Q4UKR1.2       | Isocitrate dehydrogenase [NADP]; [ <i>Rickettsia felis</i> URRWXCa2]                           | 3.03035E-59 | 35.88        |
| Q1RJU4.1       | Isocitrate dehydrogenase [NADP]; [ <i>Rickettsia bellii</i> RML369-C]                          | 6.19516E-58 | 34.82        |
| Q92IR7.1       | Isocitrate dehydrogenase [NADP]; [ <i>Rickettsia conorii</i> str. Malish 7]                    | 4.10157E-57 | 35.09        |
| Q9ZDR0.1       | Isocitrate dehydrogenase [NADP]; [ <i>Rickettsia prowazekii</i> str. Madrid E]                 | 5.79905E-57 | 35.45        |
| Q68XA5.1       | Isocitrate dehydrogenase [NADP]; [ <i>Rickettsia typhi</i> str. Wilmington]                    | 1.78173E-56 | 34.29        |
| ...            | ...                                                                                            | ...         | ...          |
| O27441.1       | 3-isopropylmalate dehydrogenase; [ <i>Methanothermobacter thermautotrophicus</i> str. Delta H] | 4.50989E-51 | 30.97        |
| ...            | ...                                                                                            | ...         | ...          |
| O29627.1       | 3-isopropylmalate dehydrogenase; [ <i>Archaeoglobus fulgidus</i> DSM 4304]                     | 8.66687E-47 | 32.41        |
| P50455.3       | 3-isopropylmalate dehydrogenase; [ <i>Sulfurisphaera tokodaii</i> str. 7]                      | 1.07086E-46 | 30.81        |

450

451 **Table A2.** Overview on NADP-dependent IDHs with a mostly complete set of catalytic parameters listed in the BRENDA  
452 database.

| Organism                                             | pH optimum  | DL-isocitric acid            |                |                                                   | NADP*                        |              |                                                   | Refs              |
|------------------------------------------------------|-------------|------------------------------|----------------|---------------------------------------------------|------------------------------|--------------|---------------------------------------------------|-------------------|
|                                                      |             | $k_{cat}$ [s <sup>-1</sup> ] | $K_M$ [mM]     | $k_{cat}/K_M$ [mM <sup>-1</sup> s <sup>-1</sup> ] | $k_{cat}$ [s <sup>-1</sup> ] | $K_M$ [mM]   | $k_{cat}/K_M$ [mM <sup>-1</sup> s <sup>-1</sup> ] |                   |
| <i>Archaeoglobus fulgidus</i>                        | 8.6         | 255                          | 0.332          | 700                                               | 219                          | 0.0165       | 13 300                                            | [46,70]           |
| <i>Bifidobacterium longum</i> subsp. <i>infantis</i> | 8.0         | NA                           | NA             | NA                                                | 36.4                         | 0.01945      | 1 871*                                            | [55]              |
| <i>Escherichia coli</i>                              | 8.0         | 106.4                        | 0.0405         | 2 600                                             | 88.1                         | 0.0392       | 2 200                                             | [70]              |
| <i>Haloferax volcanii</i>                            | 8.0         | 0.0023                       | 0.108          | 0.021*                                            | 0.003                        | 0.101        | 0.030*                                            | [23,71,72]        |
| <i>Microcystis aeruginosa</i>                        | 7.5         | 43.21                        | 0.1243         | 347.63*                                           | 48.88                        | 0.0322       | 1 518*                                            | [73]              |
| <i>Mycobacterium tuberculosis</i> <sup>1</sup>       | 7.5         | 3.8                          | 0.01           | 380*                                              | 4                            | 0.125        | 32*                                               | [74]              |
| <i>Mycobacterium tuberculosis</i> <sup>2</sup>       | 7.5         | 19.6                         | 0.02           | 980*                                              | 37.4                         | 0.0196       | 1 908*                                            | [74]              |
| <i>Plasmodium falciparum</i>                         | 8.0         | 138                          | 0.04           | 3 450*                                            | 138                          | 0.09         | 1 533*                                            | [75]              |
| <i>Sus scrofa</i>                                    | 7.4         | 58.3                         | 0.0026         | 22 423*                                           | 32.2                         | 0.0088       | 3 659*                                            | [76,77]           |
| <i>Yarrowia lipolytica</i>                           | 8.5         | NA                           | NA             | NA                                                | 72                           | 0.058        | 1 220                                             | [78]              |
| <b>“Ca. Micrarchaeum harzensis A_DKE”</b>            | <b>7.89</b> | <b>38.48</b>                 | <b>0.0530</b>  | <b>725</b>                                        | <b>43.99</b>                 | <b>1.94</b>  | <b>22.69</b>                                      | <b>This study</b> |
|                                                      |             | <b>±1.62</b>                 | <b>±0.0056</b> | <b>±107.62</b>                                    | <b>±1.46</b>                 | <b>±0.12</b> | <b>±2.15</b>                                      |                   |

453 <sup>1</sup> IDH isoform 1; <sup>2</sup> IDH isoform 2; \*missing value was calculated from the other two given values; NA: not available

454 **Table A3.** List of known and putative H<sup>+</sup>- and cation-transporters encoded in the A\_DKE genome. Given with the respective  
455 e- values for KEGG Orthology (KO) prediction and transcriptomic TPM-values indicating their relative expression levels. Data  
456 taken from [17].

| <b>Gene</b> | <b>Putative function</b>                                     | <b>KO identifier</b> | <b>e-value</b> | <b>TPM</b> |
|-------------|--------------------------------------------------------------|----------------------|----------------|------------|
| Micr_00103  | manganese transport protein                                  | K03322               | 7.6E-29        | 0.31       |
| Micr_00140  | sodium transport system permease protein                     | K09696               | 4.2E-21        | 0.24       |
| Micr_00144  | MscS family membrane protein                                 | K16052               | 1.8E-30        | 0.77       |
| Micr_00155  | voltage-gated potassium channel                              | K10716               | 1.2E-28        | 0.71       |
| Micr_00226  | inorganic pyrophosphatase                                    | K01507               | 1.00E-38       | 4.22       |
| Micr_00278  | ammonium transporter, Amt family                             | K03320               | 7.6E-43        | 0.06       |
| Micr_00279  | ammonium transporter, Amt family                             | K03320               | 4.9E-21        | 0.05       |
| Micr_00330  | MFS transporter, PHS family, inorganic phosphate transporter | K08176               | 5.3E-121       | 0.52       |
| Micr_00498  | inorganic pyrophosphatase                                    | K01507               | 5.9E-19        | 0.42       |
| Micr_00551  | vacuolar iron transporter family protein                     | K22736               | 5.4E-23        | 0.86       |

457

## 458 References

459

- 460 1. Kristjánsson, J.K.; Hreggvidsson, G.O. Ecology and Habitats of Extremophiles. *World J. Microbiol.*  
461 *Biotechnol.* **1995**, *11*, 17–25, doi:10.1007/BF00339134.
- 462 2. Pikuta, E. V.; Hoover, R.B.; Tang, J. Microbial Extremophiles at the Limits of Life. *Crit. Rev. Microbiol.*  
463 **2007**, *33*, 183–209, doi:10.1080/10408410701451948.
- 464 3. Horikoshi, K.; Antranikian, G.; Bull, A.T.; Robb, F.T.; Stetter, K.O.; Co-Eds. *Extremophiles Handbook*  
465 *Volume 1*; Horikoshi, K., Ed.; 1st ed.; Springer, Tokyo, 1981; Vol. 53; ISBN 9788578110796.
- 466 4. Charlesworth, J.; Burns, B.P. Extremophilic Adaptations and Biotechnological Applications in Diverse  
467 Environments. *AIMS Microbiol.* **2016**, *2*, 251–261, doi:10.3934/microbiol.2016.3.251.
- 468 5. Baker-Austin, C.; Dopson, M. Life in Acid: pH Homeostasis in Acidophiles. *Trends Microbiol.* **2007**, *15*,  
469 165–171, doi:10.1016/j.tim.2007.02.005.
- 470 6. Golyshina, O. V.; Golyshin, P.N.; Timmis, K.N.; Ferrer, M. The ‘pH Optimum Anomaly’ of Intracellular  
471 Enzymes of *Ferroplasma acidiphilum*. *Environ. Microbiol.* **2006**, *8*, 416–425, doi:10.1111/j.1462-  
472 2920.2005.00907.x.
- 473 7. Schleper, C.; Puehler, G.; Holz, I.; Gambacorta, A.; Janekovic, D.; Santarius, U.; Klenk, H.P.; Zillig, W.  
474 *Picrophilus* Gen. Nov., Fam. Nov.: A Novel Aerobic, Heterotrophic, Thermoacidophilic Genus and  
475 Family Comprising Archaea Capable of Growth around pH 0. *J. Bacteriol.* **1995**, *177*, 7050–7059,  
476 doi:10.1128/jb.177.24.7050-7059.1995.
- 477 8. Golyshina, O. V.; Pivovarova, T.A.; Karavaiko, G.I.; Kondrat’eva, T.F.; Moore, E.R.B.; Abraham, W.R.;  
478 Lünsdorf, H.; Timmis, K.N.; Yakimov, M.M.; Golyshin, P.N. *Ferroplasma acidiphilum* Gen. Nov., Sp.  
479 Nov., an Acidophilic, Autotrophic, Ferrous-Iron-Oxidizing, Cell-Wall-Lacking, Mesophilic Member of  
480 the *Ferroplasmaceae* Fam. Nov., Comprising a Distinct Lineage of the Archaea. *Int. J. Syst. Evol.*  
481 *Microbiol.* **2000**, *50*, 997–1006, doi:10.1099/00207713-50-3-997.
- 482 9. Fütterer, O.; Angelov, A.; Liesegang, H.; Gottschalk, G.; Schleper, C.; Schepers, B.; Dock, C.;  
483 Antranikian, G.; Liebl, W. Genome Sequence of *Picrophilus torridus* and Its Implications for Life around  
484 pH 0. *Proc. Natl. Acad. Sci. U. S. A.* **2004**, *101*, 9091–9096, doi:10.1073/pnas.0401356101.
- 485 10. Moll, R.; Schäfer, G. Chemiosmotic H<sup>+</sup> Cycling across the Plasma Membrane of the Thermoacidophilic  
486 Archaeobacterium *Sulfolobus acidocaldarius*. *FEBS Lett.* **1988**, *232*, 359–363, doi:10.1016/0014-  
487 5793(88)80769-5.
- 488 11. Slonczewski, J.L.; Fujisawa, M.; Dopson, M.; Krulwich, T.A. *Cytoplasmic pH Measurement and*  
489 *Homeostasis in Bacteria and Archaea*; Elsevier, 2009; Vol. 55; ISBN 9780123747907.
- 490 12. Matin, A. pH Homeostasis in Acidophiles. In *Novartis Foundation Symposium 221 - Bacterial Responses*  
491 *to pH*; John Wiley & Sons, Ltd, 2007; pp. 152–166 ISBN 9780470515631.
- 492 13. Chen, L.X.; Méndez-García, C.; Dombrowski, N.; Servín-Garcidueñas, L.E.; Eloë-Fadrosch, E.A.; Fang,  
493 B.Z.; Luo, Z.H.; Tan, S.; Zhi, X.Y.; Hua, Z.S.; *et al.* Metabolic Versatility of Small Archaea Micrarchaeota  
494 and Parvarchaeota. *ISME J.* **2018**, *12*, 756–775, doi:10.1038/s41396-017-0002-z.
- 495 14. Baker, B.J.; Comolli, L.R.; Dick, G.J.; Hauser, L.J.; Hyatt, D.; Dill, B.D.; Land, M.L.; VerBerkmoes, N.C.;  
496 Hettich, R.L.; Banfield, J.F. Enigmatic, Ultrasmall, Uncultivated Archaea. *Proc. Natl. Acad. Sci.* **2010**,  
497 *107*, 8806–8811, doi:10.1073/pnas.0914470107.

- 498 15. Golyshina, O. V.; Toshchakov, S. V.; Makarova, K.S.; Gavrillov, S.N.; Korzhenkov, A.A.; La Cono, V.;  
499 Arcadi, E.; Nechitaylo, T.Y.; Ferrer, M.; Kublanov, I. V.; *et al.* ‘ARMAN’ Archaea Depend on Association  
500 with Euryarchaeal Host in Culture and in Situ. *Nat. Commun.* **2017**, *8*, 1–11, doi:10.1038/s41467-017-  
501 00104-7.
- 502 16. Kadnikov, V. V.; Savvichev, A.S.; Mardanov, A. V.; Beletsky, A. V.; Chupakov, A. V.; Kokryatskaya,  
503 N.M.; Pimenov, N. V.; Ravin, N. V. Metabolic Diversity and Evolutionary History of the Archaeal Phylum  
504 “*Candidatus* Micrarchaeota” Uncovered from a Freshwater Lake Metagenome. *Appl. Environ. Microbiol.*  
505 **2020**, *86*, 1–13, doi:10.1128/AEM.02199-20.
- 506 17. Krause, S.; Gfrerer, S.; Reuse, C.; Dombrowski, N.; Villanueva, L.; Bunk, B.; Spröer, C.; Neu, T.R.;  
507 Kuhlicke, U.; Schmidt-Hohagen, K.; *et al.* Unraveling the Critical Growth Factors for Stable Cultivation  
508 of (Nano-Sized) Micrarchaeota. *bioRxiv* **2021**, doi:10.1101/2021.04.28.441856.
- 509 18. Krause, S.; Bremges, A.; Münch, P.C.; McHardy, A.C.; Gescher, J. Characterisation of a Stable Laboratory  
510 Co-Culture of Acidophilic Nanoorganisms. *Sci. Rep.* **2017**, *7*, 1–13, doi:10.1038/s41598-017-03315-6.
- 511 19. Golyshina, O. V.; Bargiela, R.; Toshchakov, S. V.; Chernyh, N.A.; Ramayah, S.; Korzhenkov, A.A.;  
512 Kublanov, I. V.; Golyshin, P.N. Diversity of “*Ca.* Micrarchaeota” in Two Distinct Types of Acidic  
513 Environments and Their Associations with *Thermoplasmatales*. *Genes (Basel)*. **2019**, *10*, 1–11,  
514 doi:10.3390/genes10060461.
- 515 20. Ziegler, S.; Dolch, K.; Geiger, K.; Krause, S.; Asskamp, M.; Eusterhues, K.; Kriews, M.; Wilhelms-Dick,  
516 D.; Goettlicher, J.; Majzlan, J.; *et al.* Oxygen-Dependent Niche Formation of a Pyrite-Dependent  
517 Acidophilic Consortium Built by Archaea and Bacteria. *ISME J.* **2013**, *7*, 1725–1737,  
518 doi:10.1038/ismej.2013.64.
- 519 21. Gfrerer, S.; Winkler, D.; Novion Ducassou, J.; Couté, Y.; Rachel, R.; Gescher, J. Micrarchaeota Are  
520 Covered by a Proteinaceous S-Layer. *bioRxiv* **2021**, doi:10.1101/2021.04.28.441871.
- 521 22. Madshus, I.H. Regulation of Intracellular pH in Eukaryotic Cells. *Biochem. J.* **1988**, *250*, 1–8,  
522 doi:10.1042/bj2500001.
- 523 23. Camacho, M.L.; Brown, R.A.; Bonete, M.-J.; Danson, M.J.; Hough, D.W. Isocitrate Dehydrogenases from  
524 *Haloferax volcanii* and *Sulfolobus solfataricus*: Enzyme Purification, Characterisation and N-Terminal  
525 Sequence. *FEMS Microbiol. Lett.* **1995**, *134*, 85–90, doi:10.1016/0378-1097(95)00388-L.
- 526 24. Agarwala, R.; Barrett, T.; Beck, J.; Benson, D.A.; Bollin, C.; Bolton, E.; Bourexis, D.; Brister, J.R.; Bryant,  
527 S.H.; Canese, K.; *et al.* Database Resources of the National Center for Biotechnology Information. *Nucleic*  
528 *Acids Res.* **2018**, *46*, D8–D13, doi:10.1093/nar/gkx1095.
- 529 25. Jeske, L.; Placzek, S.; Schomburg, I.; Chang, A.; Schomburg, D. BRENDA in 2019: A European ELIXIR  
530 Core Data Resource. *Nucleic Acids Res.* **2019**, *47*, D542–D549, doi:10.1093/nar/gky1048.
- 531 26. Finn, R.D.; Coghill, P.; Eberhardt, R.Y.; Eddy, S.R.; Mistry, J.; Mitchell, A.L.; Potter, S.C.; Punta, M.;  
532 Qureshi, M.; Sangrador-Vegas, A.; *et al.* The Pfam Protein Families Database: Towards a More  
533 Sustainable Future. *Nucleic Acids Res.* **2016**, *44*, 279–285, doi:10.1093/nar/gkv1344.
- 534 27. Altschul, S.F.; Gish, W.; Miller, W.; Myers, E.W.; Lipman, D.J. Basic Local Alignment Search Tool. *J.*  
535 *Mol. Biol.* **1990**, *215*, 403–410, doi:10.1016/S0022-2836(05)80360-2.
- 536 28. Sievers, F.; Wilm, A.; Dineen, D.; Gibson, T.J.; Karplus, K.; Li, W.; Lopez, R.; McWilliam, H.; Remmert,  
537 M.; Söding, J.; *et al.* Fast, Scalable Generation of High-Quality Protein Multiple Sequence Alignments  
538 Using Clustal Omega. *Mol. Syst. Biol.* **2011**, *7*, doi:10.1038/msb.2011.75.

- 539 29. Sievers, F.; Higgins, D.G. Clustal Omega for Making Accurate Alignments of Many Protein Sequences.  
540 *Protein Sci.* **2018**, *27*, 135–145, doi:10.1002/pro.3290.
- 541 30. Sievers, F.; Barton, G.J.; Higgins, D.G. Multiple Sequence Alignments. In *Bioinformatics*; Baxevanis,  
542 A.D., Bader, G.D., Wishart, D.S., Eds.; Wiley, 2020; pp. 227–250 ISBN 9781119335580.
- 543 31. Robert, X.; Gouet, P. Deciphering Key Features in Protein Structures with the New ENDScript Server.  
544 *Nucleic Acids Res.* **2014**, *42*, 320–324, doi:10.1093/nar/gku316.
- 545 32. Gonçalves, S.; Miller, S.P.; Carrondo, M.A.; Dean, A.M.; Matias, P.M. Induced Fit and the Catalytic  
546 Mechanism of Isocitrate Dehydrogenase. *Biochemistry* **2012**, *51*, 7098–7115, doi:10.1021/bi300483w.
- 547 33. Yang, J.; Wang, Y.; Zhang, Y. ResQ: An Approach to Unified Estimation of B-Factor and Residue-  
548 Specific Error in Protein Structure Prediction. *J. Mol. Biol.* **2016**, *428*, 693–701,  
549 doi:10.1016/j.jmb.2015.09.024.
- 550 34. Yang, J.; Roy, A.; Zhang, Y. BioLiP: A Semi-Manually Curated Database for Biologically Relevant  
551 Ligand-Protein Interactions. *Nucleic Acids Res.* **2013**, *41*, 1096–1103, doi:10.1093/nar/gks966.
- 552 35. Yang, J.; Roy, A.; Zhang, Y. Protein-Ligand Binding Site Recognition Using Complementary Binding-  
553 Specific Substructure Comparison and Sequence Profile Alignment. *Bioinformatics* **2013**, *29*, 2588–2595,  
554 doi:10.1093/bioinformatics/btt447.
- 555 36. Salentin, S.; Schreiber, S.; Haupt, V.J.; Adasme, M.F.; Schroeder, M. PLIP: Fully Automated Protein-  
556 Ligand Interaction Profiler. *Nucleic Acids Res.* **2015**, *43*, W443–W447, doi:10.1093/nar/gkv315.
- 557 37. Gibson, D.G.; Young, L.; Chuang, R.Y.; Venter, J.C.; Hutchison, C.A.; Smith, H.O. Enzymatic Assembly  
558 of DNA Molecules up to Several Hundred Kilobases. *Nat. Methods* **2009**, *6*, 343–345,  
559 doi:10.1038/nmeth.1318.
- 560 38. Bradford, M.M. A Rapid and Sensitive Method for the Quantitation of Microgram Quantities of Protein  
561 Utilizing the Principle of Protein-Dye Binding. *Anal. Biochem.* **1976**, *72*, 248–254, doi:10.1016/0003-  
562 2697(76)90527-3.
- 563 39. Laemmli, U.K. Cleavage of Structural Proteins during the Assembly of the Head of Bacteriophage T4.  
564 *Nature* **1970**, *227*, 680–685, doi:10.1038/227680a0.
- 565 40. Reeves, H.C.; Daumy, G.O.; Lin, C.C.; Houston, M. NADP<sup>+</sup>-Specific Isocitrate Dehydrogenase of  
566 *Escherichia coli*. *Biochim. Biophys. Acta* **1972**, *258*, 27–39, doi:10.1016/0005-2744(72)90964-3.
- 567 41. Michaelis, L.; Menten, M.L. Die Kinetik Der Invertinwirkung. *Biochemische Zeitschrift.* **1913**, *49*, 333–  
568 369.
- 569 42. Johnson, K.; Goody, R. The Original Michaelis Constant: Translation of the 1913 Michaelis-Menten  
570 Paper. *Biochemistry* **2012**, *50*, 8264–8269, doi:10.1021/bi201284u.
- 571 43. Horikoshi, K. Alkaliphiles: Some Applications of Their Products for Biotechnology. *Microbiol. Mol. Biol.*  
572 *Rev.* **1999**, *63*, 735–750.
- 573 44. Steen, I.H.; Madern, D.; Karlström, M.; Lien, T.; Ladenstein, R.; Birkeland, N.-K. Comparison of  
574 Isocitrate Dehydrogenase from Three Hyperthermophiles Reveals Differences in Thermostability,  
575 Cofactor Specificity, Oligomeric State, and Phylogenetic Affiliation. *J. Biol. Chem.* **2001**, *276*, 43924–  
576 43931, doi:10.1074/jbc.M105999200.
- 577 45. Zhu, G.; Golding, G.B.; Dean, A.M. The Selective Cause of an Ancient Adaptation. *Science (80-. ).* **2005**,  
578 *307*, 1279–1282, doi:10.1126/science.1106974.
- 579



- 580 46. Steen, I.H.; Lien, T.; Birkeland, N.K. Biochemical and Phylogenetic Characterization of Isocitrate  
581 Dehydrogenase from a Hyperthermophilic Archaeon, *Archaeoglobus fulgidus*. *Arch. Microbiol.* **1997**,  
582 *168*, 412–420, doi:10.1007/s002030050516.
- 583 47. Potter, S. Evidence for a Dual-Specificity Isocitrate Dehydrogenase in the Euryarchaeotan *Thermoplasma*  
584 *acidophilum*. *Can. J. Microbiol.* **1993**, *39*, 262–264, doi:10.1139/m93-037.
- 585 48. Danson, M.J.; Wood, P.A. Isocitrate Dehydrogenase of the Thermoacidophilic Archaeobacterium  
586 *Sulpholobus acidocaldarius*. *FEBS Lett.* **1984**, *172*, 289–293, doi:10.1016/0014-5793(84)81143-6.
- 587 49. Dean, A.M.; Koshland, D.E. Kinetic Mechanism of *Escherichia coli* Isocitrate Dehydrogenase.  
588 *Biochemistry* **1993**, *32*, 9302–9309, doi:10.1021/bi00087a007.
- 589 50. Dean, A.M.; Golding, G.B. Protein Engineering Reveals Ancient Adaptive Replacements in Isocitrate  
590 Dehydrogenase. *Proc. Natl. Acad. Sci. U. S. A.* **1997**, *94*, 3104–3109, doi:10.1073/pnas.94.7.3104.
- 591 51. Hurley, J.H.; Dean, A.M.; Koshland, D.E.; Stroud, R.M. Catalytic Mechanism of NADP<sup>+</sup>-Dependent  
592 Isocitrate Dehydrogenase: Implications from the Structures of Magnesium-Isocitrate and NADP<sup>+</sup>  
593 Complexes. *Biochemistry* **1991**, *30*, 8671–8678, doi:10.1021/bi00099a026.
- 594 52. Kondo, H.; Murakami, M. Crystal Structures of the Putative Isocitrate Dehydrogenase from *Sulfolobus*  
595 *tokodaii* Strain 7 in the Apo and NADP<sup>+</sup>-Bound Forms. *Archaea* **2018**, *2018*, doi:10.1155/2018/7571984.
- 596 53. Karlström, M.; Stokke, R.; Helene Steen, I.; Birkeland, N.K.; Ladenstein, R. Isocitrate Dehydrogenase  
597 from the Hyperthermophile *Aeropyrum pernix*: X-Ray Structure Analysis of a Ternary Enzyme-Substrate  
598 Complex and Thermal Stability. *J. Mol. Biol.* **2005**, *345*, 559–577, doi:10.1016/j.jmb.2004.10.025.
- 599 54. Colman, R.F. Role of Metal Ions in Reactions Catalyzed by Pig Heart Triphosphopyridine Nucleotide-  
600 Dependent Isocitrate Dehydrogenase. *J. Biol. Chem.* **1972**, *247*, 215–223.
- 601 55. Huang, S.P.; Cheng, H.M.; Wang, P.; Zhu, G.P. Biochemical Characterization and Complete Conversion  
602 of Coenzyme Specificity of Isocitrate Dehydrogenase from *Bifidobacterium longum*. *Int. J. Mol. Sci.* **2016**,  
603 *17*, doi:10.3390/ijms17030296.
- 604 56. Stoddard, B.L.; Dean, A.; Koshland, D.E. Structure of Isocitrate Dehydrogenase with Isocitrate,  
605 Nicotinamide Adenine Dinucleotide Phosphate and Calcium at 2.5-Å Resolution: A Pseudo-Michaelis  
606 Ternary Complex. *Biochemistry* **1993**, *32*, 9310–9316, doi:10.1021/bi00087a008.
- 607 57. Searcy, D.G. *Thermoplasma acidophilum*: Intracellular pH and Potassium Concentration. *BBA - Gen. Subj.*  
608 **1976**, *451*, 278–286, doi:10.1016/0304-4165(76)90278-6.
- 609 58. Stokke, R.; Birkeland, N.K.; Steen, I.H. Thermal Stability and Biochemical Properties of Isocitrate  
610 Dehydrogenase from the Thermoacidophilic Archaeon *Thermoplasma acidophilum*. *Extremophiles* **2007**,  
611 *11*, 397–402, doi:10.1007/s00792-006-0045-y.
- 612 59. Nakai, H.; Baumann, M.J.; Petersen, B.O.; Westphal, Y.; Schols, H.; Dilokpimol, A.; Hachem, M.A.;  
613 Lahtinen, S.J.; Duus, J.O.; Svensson, B. The Maltodextrin Transport System and Metabolism in  
614 *Lactobacillus acidophilus* NCFM and Production of Novel  $\alpha$ -Glucosides through Reverse Phosphorolysis  
615 by Maltose Phosphorylase. *FEBS J.* **2009**, *276*, 7353–7365, doi:10.1111/j.1742-4658.2009.07445.x.
- 616 60. Nguyen, T.-H.; Splechna, B.; Krasteva, S.; Kneifel, W.; Kulbe, K.D.; Divne, C.; Haltrich, D.  
617 Characterization and Molecular Cloning of a Heterodimeric  $\beta$ -Galactosidase from the Probiotic Strain  
618 *Lactobacillus acidophilus* R22. *FEMS Microbiol. Lett.* **2007**, *269*, 136–144, doi:10.1111/j.1574-  
619 6968.2006.00614.x.
- 620

- 621 61. Chen, R.; Greer, A.; Dean, A.M. A Highly Active Decarboxylating Dehydrogenase with Rationally  
622 Inverted Coenzyme Specificity. *Proc. Natl. Acad. Sci. U. S. A.* **1995**, *92*, 11666–11670,  
623 doi:10.1073/pnas.92.25.11666.
- 624 62. Chen, R.; Greer, A.F.; Dean, A.M.; Hurley, J.H. Engineering Secondary Structure to Invert Coenzyme  
625 Specificity in Isopropylmalate Dehydrogenase. *Tech. Protein Chem.* **1997**, *8*, 809–816,  
626 doi:10.1016/S1080-8914(97)80078-6.
- 627 63. Roos, A.; Boron, W.F. Intracellular pH. *Physiol. Rev.* **1981**, *61*, 296–434.
- 628 64. Elferink, M.G.L.; de Wit, J.G.; Driessen, A.J.M.; Konings, W.N. Stability and Proton-Permeability of  
629 Liposomes Composed of Archaeal Tetraether Lipids. *BBA - Biomembr.* **1994**, *1193*, 247–254,  
630 doi:10.1016/0005-2736(94)90160-0.
- 631 65. Hanford, M.J.; Peeples, T.L. Archaeal Tetraether Lipids - Unique Structures and Applications. *Appl.*  
632 *Biochem. Biotechnol.* **2002**, *97*, 45–62, doi:10.1385/ABAB:97:1:45.
- 633 66. Konings, W.N.; Albers, S.V.; Koning, S.; Driessen, A.J.M. The Cell Membrane Plays a Crucial Role in  
634 Survival of Bacteria and Archaea in Extreme Environments. *Antonie van Leeuwenhoek - Int. J. Gen. Mol.*  
635 *Microbiol.* **2002**, *81*, 61–72, doi:10.1023/A:1020573408652.
- 636 67. Van de Vossenberg, J.L.C.M.; Driessen, A.J.M.; Konings, W.N. The Essence of Being Extremophilic:  
637 The Role of the Unique Archaeal Membrane Lipids. *Extremophiles* 1998, *2*, 163–170.
- 638 68. Shimada, H.; Nemoto, N.; Shida, Y.; Oshima, T.; Yamagishi, A. Effects of pH and Temperature on the  
639 Composition of Polar Lipids in *Thermoplasma acidophilum* HO-62. *J. Bacteriol.* **2008**, *190*, 5404–5411,  
640 doi:10.1128/JB.00415-08.
- 641 69. Wang, X.; Lv, B.; Cai, G.; Fu, L.; Wu, Y.; Wang, X.; Ren, B.; Ma, H. A Proton Shelter Inspired by the  
642 Sugar Coating of Acidophilic Archaea. *Sci. Rep.* **2012**, *2*, 1–5, doi:10.1038/srep00892.
- 643 70. Stokke, R.; Karlström, M.; Yang, N.; Leiros, I.; Ladenstein, R.; Birkeland, N.K.; Steen, I.H. Thermal  
644 Stability of Isocitrate Dehydrogenase from *Archaeoglobus fulgidus* Studied by Crystal Structure Analysis  
645 and Engineering of Chimers. *Extremophiles* **2007**, *11*, 481–493, doi:10.1007/s00792-006-0060-z.
- 646 71. Camacho, M.; Rodríguez-Arnedo, A.; Bonete, M.J. NADP-Dependent Isocitrate Dehydrogenase from the  
647 Halophilic Archaeon *Haloferax volcanii*: Cloning, Sequence Determination and Overexpression in  
648 *Escherichia coli*. *FEMS Microbiol. Lett.* **2002**, *209*, 155–160, doi:10.1016/S0378-1097(02)00469-X.
- 649 72. Rodríguez-Arnedo, A.; Camacho, M.; Llorca, F.; Bonete, M.J. Complete Reversal of Coenzyme  
650 Specificity of Isocitrate Dehydrogenase from *Haloferax volcanii*. *Protein J.* **2005**, *24*, 259–266,  
651 doi:10.1007/s10930-005-6746-8.
- 652 73. Jin, M.M.; Wang, P.; Li, X.; Zhao, X.Y.; Xu, L.; Song, P.; Zhu, G.P. Biochemical Characterization of  
653 NADP<sup>+</sup>-Dependent Isocitrate Dehydrogenase from *Microcystis aeruginosa* PCC7806. *Mol. Biol. Rep.*  
654 **2013**, *40*, 2995–3002, doi:10.1007/s11033-012-2371-8.
- 655 74. Banerjee, S.; Nandyala, A.; Podili, R.P.; Katoch, V.M.; Hasnain, S.E. Comparison of *Mycobacterium*  
656 *tuberculosis* Isocitrate Dehydrogenases (ICD-1 and ICD-2) Reveals Differences in Coenzyme Affinity,  
657 Oligomeric State, pH Tolerance and Phylogenetic Affiliation. *BMC Biochem.* **2005**, *6*, 1–14,  
658 doi:10.1186/1471-2091-6-20.
- 659 75. Wrenger, C.; Müller, S. Isocitrate Dehydrogenase of *Plasmodium falciparum*: Energy Metabolism or  
660 Redox Control? *Eur. J. Biochem.* **2003**, *270*, 1775–1783, doi:10.1046/j.1432-1033.2003.03536.x.
- 661

- 662 76. Lee, P.; Colman, R.F. Thr373, Asp375, and Lys260 Are in the Coenzyme Site of Porcine NADP-  
663 Dependent Isocitrate Dehydrogenase. *Arch. Biochem. Biophys.* **2006**, *450*, 183–190,  
664 doi:10.1016/j.abb.2006.04.001.
- 665 77. Plaut, G.W.E. Isocitrate Dehydrogenase. In *The Enzymes*; Boyer, P.D., Lardy, H., Myrbäck, K., Eds.; 2nd  
666 ed.; Academic Press: New York, NY, 1963; pp. 105–126.
- 667 78. Li, X.; Wang, P.; Ge, Y.; Wang, W.; Abbas, A.; Zhu, G. NADP<sup>+</sup>-Specific Isocitrate Dehydrogenase from  
668 Oleaginous Yeast *Yarrowia lipolytica* CLIB122: Biochemical Characterization and Coenzyme Sites  
669 Evaluation. *Appl. Biochem. Biotechnol.* **2013**, *171*, 403–416, doi:10.1007/s12010-013-0373-1.
- 670
